# Supplementary material for: A benchmarking program to support software process improvement adaptation in a developing country, a Pakistan case
Source: PeerJ Comput Sci. 2022 Apr 27;8:e936. doi: 10.7717/peerj-cs.936 (PMC9137942; doi:10.7717/peerj-cs.936)
Supplement: Supplemental Information 1 — Each data point in “Raw Data” indicates different metrics data to quantify SDPI benefits [file peerj-cs-08-936-s001.xls]

## Sheet: Questionnaire
0. PROCESS COMPLIANCE: Your Organization's Process Maturity Ranking at the time of attempting individual Software Development Project	0. PROCESS COMPLIANCE: Your Organization's Process Maturity Ranking at the time of attempting individual Software Development Project. Standard ISO/CMMI ratings	Mapping with Prediction Studies: i.e. Productivity Parameters used as COCOMO II Ranking	Mapping with Benchmark Studies: i.e. Performance Parameters in Capers John's Productivity and Quality Ranking	2. INTRO: Type of Project	4. INTRO: Software Development Life Cycle (SDLC) being used	5. Process Efficiency: Project Duration, CycleTime, Time to Market, Elapsed Time (Actual Value) in Hours	6. Process Efficiency: Project Duration, CycleTime, Time to Market, Elapsed Time (Planned Value) in Hours	7. Schedule Variance, Project Delays, Ahead of Schedule = (A - P)/A, - Over est,	# of Working Hours in One Month	Software Size (PU | UUCP | Funtion Points)	Total Software Size LOC (Reused + Non Reused)	Non Reused Code Size	Reused Code Size	8. Final Equivalent Software Size LOC	8a. Final Equivalent Software Size KLOC	9. FP Size, backfired from Total Software Size LOC	10a. Percentage of "Reused Code" in "Software Size"	Reused Code = % of reused code * Software Size	Assessment and Assimilation needed = AA Inc	3 degree modification in Design, Code and Integration = AAF	Adaptation Adjustment Modifier = AAM= [AA + AAF + (0.02*SU*UNFM)] /100	Automatically Translated Code = ATC=(1-(AT/100))	10b. Equivalent Reused Code Size = Reused Code * AAM * ATC	11a. Percentage of Code Discarded, due to Requirement Volatility (BREAK, REVAL)	11b. Discarded Code due to Requirement Volitality, from Final Equivalent Software Size LOC	In Maintenance: Percentage of Code Added and Modified during Maintenance Period within 6 months only and also taking for Development period	In Maintenance: Code Added and Modified	Maintenance Code Size: Software Understanding Increment (SU)	Maintenance Code Size: Software Understanding Increment (SU)	Maintenance Code Size: Programmer Unfamiliarity (UNFM)	Maintenance Code Size: Programmer Unfamiliarity (UNFM)	12. Adjusted Equivalent Maintenance Code Size = Base Code Size * (Code Added and Modified/Base Code Size) * [1+(SU/100)* UNFM]	13. Product Unit Price in $ (Actual Cost) = Effort Actual * Avg Salary per hour	14. Product Unit Price in $ (Planned Cost) = Effort Actual * Avg Salary per hour	15. Product Cost Variance, Prediction Accuracy = (A - P) / A, - Over Estimation	16. Avg. Salary Drawn by a Technical personnel per hour in $	17. Men Power: Team Size | Number of Technical people worked for project (ACTUAL)	17a. Men Power: Team Size | Number of Technical people worked for project (ACTUAL) = Ea/Sa	18. Men Power: Average Loading = Effort Estimated / Schedule Estimated (PLANNED) = Ep/Sp	19. Men Power Variance, Prediction Accuracy = (A - P) / A	Total Effort in Hours (Actual Value) 1	2	20. Total Effort in Hours (Actual Value)	Total Effort in Hour (Planned Value)	2	21. Total Effort in Hour (Planned Value)	22. Effort Variance, Prediction Accuracy = (A-P)/A	% effort of Code + Testing phases effected.	23. Effort Distribution: Percentage of Effort saved through the Reuse of work products, out of Total Effort [14]
None	None	EL	1	Command and Control	iterative Waterfall Model	1500	625	0.583333	125	10453.8	126712	104538	22174.6	114814	114.814	3167.81	10	12671.2	4	1.5	0.061	1	772.945	8	9185.12	10	11481.4	N	30	EH	1	14925.8	32992.5	69742.7	-1.1139	5	28	4.399	22.3177	-4.07335	718.5	5880	6598.5	3339.54	10609	13948.5	-1.1139	58	5.8
None	None	EL	1	Command and Control	iterative Waterfall Model	1500	625	0.583333	125	4940.94	59890.2	49409.4	10480.8	54266.5	54.2665	1497.25	10	5989.02	4	1.5	0.061	1	365.33	8	4341.32	10	5426.65	N	30	EH	1	7054.64	30150	80322.9	-1.66411	5	28	4.02	25.7033	-5.39386	871	5159	6030	11225.6	4839	16064.6	0.62464	61	6.1
None	None	EL	1	Command and Control	iterative Waterfall Model	1500	625	0.583333	125	3459.16	41929.2	34591.6	7337.6	37992.1	37.9921	1048.23	10	4192.92	4	1.5	0.061	1	255.768	8	3039.36	10	3799.21	N	30	EH	1	4938.97	10867.5	24235.9	-1.23012	5	28	1.449	7.75548	-4.3523	354.5	1819	2173.5	1478.18	3369	4847.18	0.551594	61.1	6.11
none ---> towards ISO	none ---> towards ISO	EL	1	Command and Control	iterative Waterfall Model	1500	625	0.583333	125	3632.52	44030.5	36325.2	7705.34	39896.1	39.8961	1100.76	10	4403.05	4	1.5	0.061	1	268.586	8	3191.69	10	3989.61	N	30	EH	1	5186.49	12020	18844	-0.567724	5	28	1.60267	6.03009	-2.76254	65	2339	2404	401.809	3367	3768.81	0.362133	61.2	6.12
none	none	EL	1	Command and Control	iterative Waterfall Model	1500	625	0.583333	125	940.56	11400.7	9405.6	1995.13	10330.2	10.3302	285.018	10	1140.07	4	1.5	0.061	1	69.5444	8	826.416	10	1033.02	N	30	EH	1	1342.93	6838	6336.53	0.0733361	5	28	0.911733	2.02769	-1.22399	33.6	1334	1367.6	294.306	973	1267.31	-0.0791399	58	5.8
none ---> towards ISO	none ---> towards ISO	EL	1	Command and Control	iterative Waterfall Model	1500	625	0.583333	125	1189.07	14413	11890.7	2522.27	13059.6	13.0596	360.324	10	1441.3	4	1.5	0.061	1	87.9191	8	1044.77	10	1305.96	N	30	EH	1	1697.75	4482.5	6951.06	-0.55071	5	28	0.597667	2.22434	-2.7217	93.5	803	896.5	327.211	1063	1390.21	0.355134	58	5.8
none ---> towards ISO	none ---> towards ISO	EL	1	Command and Control	iterative Waterfall Model	1500	625	0.583333	125	1575.02	19091.1	15750.2	3340.95	17298.5	17.2985	477.279	10	1909.11	4	1.5	0.061	1	116.456	8	1383.88	10	1729.85	N	30	EH	1	2248.8	4965	8746.07	-0.761545	5	28	0.662	2.79874	-3.22771	18	975	993	238.214	1511	1749.21	0.432316	58.1	5.81
none	none	EL	1	Command and Control	iterative Waterfall Model	1500	625	0.583333	125	2137.83	25913.1	21378.3	4534.79	23479.8	23.4798	647.827	10	2591.31	4	1.5	0.061	1	158.07	8	1878.39	10	2347.98	N	30	EH	1	3052.38	6487.5	14335	-1.20963	5	28	0.865	4.58719	-4.30311	15.5	1282	1297.5	879.994	1987	2866.99	0.547435	58.2	5.82
none ---> towards ISO	none ---> towards ISO	EL	1	Command and Control	iterative Waterfall Model	1500	625	0.583333	125	674.4	8174.54	6744	1430.54	7406.95	7.40695	204.364	10	817.454	4	1.5	0.061	1	49.8647	8	592.556	10	740.695	N	30	EH	1	962.904	2882.5	8528.03	-1.95855	5	28	0.384333	2.72897	-6.10053	4.5	572	576.5	1063.61	642	1705.61	0.661997	60	6
none ---> towards ISO	none ---> towards ISO	EL	1	Command and Control	iterative Waterfall Model	1500	625	0.583333	125	81.5	987.879	815	172.879	895.117	0.895117	24.697	10	98.7879	4	1.5	0.061	1	6.02606	8	71.6093	10	89.5117	N	30	EH	1	116.365	315	315	0	5	28	0.042	0.1008	-1.4		63	63		63	63	0	58	5.8
none	none	EL	1	Command and Control	iterative Waterfall Model	1500	625	0.583333	125	1023.9	12410.9	10239	2171.91	11245.5	11.2455	310.273	10	1241.09	4	1.5	0.061	1	75.7065	8	899.642	10	1124.55	N	30	EH	1	1461.92	2470	5170	-1.09312	5	28	0.329333	1.6544	-4.02348	0	494	494	0	1034	1034	0.522244	58	5.8
none	none	EL	1	Command and Control	iterative Waterfall Model	1500	625	0.583333	125	2.5	30.303	25	5.30302	27.4576	0.0274576	0.757576	10	3.0303	4	1.5	0.061	1	0.184848	8	2.19661	10	2.74576	N	30	EH	1	3.56948	295	15	0.949153	5	28	0.0393333	0.0048	0.877966			59		3	3	-18.6667	60	6
none ---> towards ISO	none ---> towards ISO	EL	1	Command and Control	iterative Waterfall Model	1500	625	0.583333	125	7	84.8485	70	14.8485	76.8812	0.0768812	2.12121	10	8.48485	4	1.5	0.061	1	0.517576	8	6.1505	10	7.68812	N	30	EH	1	9.99456	107.5	811416	-7547.06	5	28	0.0143333	259.653	-18114.3	14.5	7	21.5	162276	7	162283	0.999868	61	6.1
none	none	EL	1	Command and Control	iterative Waterfall Model	1500	625	0.583333	125	976.54	11836.8	9765.4	2071.45	10725.4	10.7254	295.921	10	1183.68	4	1.5	0.061	1	72.2048	8	858.029	10	1072.54	N	30	EH	1	1394.3	2530	4770	-0.885375	5	28	0.337333	1.5264	-3.5249		506	506		954	954	0.469602	59	5.9
none	none	EL	1	Command and Control	iterative Waterfall Model	1500	625	0.583333	125	523.88	6350.06	5238.8	1111.26	5753.79	5.75379	158.751	10	635.006	4	1.5	0.061	1	38.7354	8	460.303	10	575.379	N	30	EH	1	747.993	3039.75	4248.15	-0.397531	5	28	0.4053	1.35941	-2.35408	246.95	361	607.95	281.629	568	849.629	0.284453	58	5.8
none	none	EL	1	Command and Control	iterative Waterfall Model	1500	625	0.583333	125	1608.54	19497.5	16085.4	3412.05	17666.6	17.6666	487.436	10	1949.75	4	1.5	0.061	1	118.934	8	1413.33	10	1766.66	N	30	EH	1	2296.66	7980	12563.4	-0.574362	5	28	1.064	4.02029	-2.77847	77	1519	1596	1018.68	1494	2512.68	0.364822	59.4	5.94
none	none	EL	1	Command and Control	iterative Waterfall Model	1500	625	0.583333	125	2327.71	28214.7	23277.1	4937.56	25565.3	25.5653	705.367	10	2821.47	4	1.5	0.061	1	172.109	8	2045.22	10	2556.53	N	30	EH	1	3323.49	8207.5	16886.1	-1.05739	5	28	1.09433	5.40354	-3.93774	91.5	1550	1641.5	922.211	2455	3377.21	0.513948	59.3	5.93
ISO 2 yrs 2004 sept	ISO 2 yrs 2004 sept	L	2	Command and Control	iterative Waterfall Model	1500	625	0.583333	125	863.44	10465.9	8634.4	1831.54	8743.92	8.74392	261.648	17.5	1831.54	4	1.5	0.0598	1	109.526	9	786.953	10	874.392	N	30	VH	0.8	1084.25	5221.2	5699.49	-0.0916048	5.7	28	0.610667	1.59986	-1.61985	0	916	916	90.91	909	999.91	0.0839176	65	11.375
iso 1 yr	iso 1 yr	L	2	Command and Control	iterative Waterfall Model	1500	625	0.583333	125	119.7	1450.91	1197	253.909	1212.18	1.21218	36.2727	17.5	253.909	4	1.5	0.0598	1	15.1838	9	109.097	10	121.218	N	30	VH	0.8	150.311	644.1	735.3	-0.141593	5.7	28	0.0753333	0.2064	-1.73982		113	113		129	129	0.124031	58	10.15
iso 1 yr	iso 1 yr	L	2	Command and Control	iterative Waterfall Model	1500	625	0.583333	125	2.5	30.303	25	5.30302	25.3171	0.0253171	0.757576	17.5	5.30303	4	1.5	0.0598	1	0.317121	9	2.27854	10	2.53171	N	30	VH	0.8	3.13932	342	17.1	0.95	5.7	28	0.04	0.0048	0.88		60	60		3	3	-19	59	10.325
iso 1 yr	iso 1 yr	L	2	Command and Control	iterative Waterfall Model	1500	625	0.583333	125	150.8	1827.88	1508	319.878	1527.13	1.52713	45.697	17.5	319.879	4	1.5	0.0598	1	19.1287	9	137.442	10	152.713	N	30	VH	0.8	189.364	897.75	1293.81	-0.441164	5.7	28	0.105	0.363173	-2.45879	21.5	136	157.5	87.9833	139	226.983	0.306116	58	10.15
iso 1 yr	iso 1 yr	L	2	Command and Control	iterative Waterfall Model	1500	625	0.583333	125	26.3	318.788	263	55.7878	266.336	0.266336	7.9697	17.5	55.7879	4	1.5	0.0598	1	3.33611	9	23.9702	10	26.6336	N	30	VH	0.8	33.0257	826.5	2822.85	-2.41543	5.7	28	0.0966667	0.79238	-7.19703	127	18	145	466.237	29	495.237	0.707211	59	10.325
iso 1 yr	iso 1 yr	L	2	Command and Control	iterative Waterfall Model	1500	625	0.583333	125	2414.89	29271.4	24148.9	5122.49	24455.2	24.4552	731.785	17.5	5122.49	4	1.5	0.0598	1	306.325	9	2200.97	10	2445.52	N	30	VH	0.8	3032.45	7586.7	12619.8	-0.663411	5.7	28	0.887333	3.5424	-2.99219		1331	1331		2214	2214	0.398826	58.2	10.185
ISO	ISO	L	2	Command and Control	iterative Waterfall Model	1500	625	0.583333	125	299	3624.24	2990	634.242	3027.93	3.02793	90.606	17.5	634.242	4	1.5	0.0598	1	37.9277	9	272.513	10	302.793	N	30	VH	0.8	375.463	1333.8	3549.49	-1.66118	5.7	28	0.156	0.996347	-5.38684	14	220	234	340.717	282	622.717	0.624227	58.4	10.22
ISO --> towards CMMI	ISO --> towards CMMI	L	2	Command and Control	iterative Waterfall Model	1500	625	0.583333	125	467.87	5671.15	4678.7	992.451	4738.05	4.73805	141.779	17.5	992.451	4	1.5	0.0598	1	59.3486	9	426.424	10	473.805	N	30	VH	0.8	587.518	2217.3	3142.87	-0.417429	5.7	28	0.259333	0.882208	-2.40183	32	357	389	77.38	474	551.38	0.294497	58.4	10.22
ISO 1 yr	ISO 1 yr	L	2	Command and Control	iterative Waterfall Model	1500	625	0.583333	125	6268.85	75986	62688.5	13297.5	63483.7	63.4837	1899.65	17.5	13297.6	4	1.5	0.0598	1	795.194	9	5713.53	10	6348.37	N	30	VH	0.8	7871.98	24718.9	48552.3	-0.964176	5.7	28	2.8911	13.6287	-3.71402	451.65	3885	4336.65	2452.95	6065	8517.95	0.490881	60	10.5
ISO --> towards CMMI	ISO --> towards CMMI	L	2	Command and Control	iterative Waterfall Model	1500	625	0.583333	125	1089.85	13210.3	10898.5	2311.8	11036.7	11.0367	330.258	17.5	2311.8	4	1.5	0.0598	1	138.246	9	993.307	10	1103.67	N	30	VH	0.8	1368.56	4742.4	8639.9	-0.821842	5.7	28	0.554667	2.42524	-3.37242	0	832	832	459.772	1056	1515.77	0.451105	59	10.325
ISO 1 year	ISO 1 year	L	2	Command and Control	iterative Waterfall Model	1500	625	0.583333	125	258.57	3134.18	2585.7	548.481	2618.5	2.6185	78.3545	17.5	548.482	4	1.5	0.0598	1	32.7992	9	235.665	10	261.85	N	30	VH	0.8	324.694	1031.7	2268.6	-1.1989	5.7	28	0.120667	0.6368	-4.27735	1	180	181	145	253	398	0.545226	58.4	10.22
ISO --> towards CMMI	ISO --> towards CMMI	L	2	Command and Control	iterative Waterfall Model	1500	625	0.583333	125	4624.9	56059.4	46249	9810.38	46835.7	46.8357	1401.48	17.5	9810.39	4	1.5	0.0598	1	586.661	9	4215.21	10	4683.57	N	30	VH	0.8	5807.62	22393	41181.5	-0.839034	5.7	28	2.61907	11.5597	-3.41368	215.6	3713	3928.6	3060.83	4164	7224.83	0.456236	60.5	10.5875
ISO --> towards CMMI	ISO --> towards CMMI	L	2	Command and Control	iterative Waterfall Model	1500	625	0.583333	125	743.97	9017.82	7439.7	1578.12	7534.07	7.53407	225.445	17.5	1578.12	4	1.5	0.0598	1	94.3715	9	678.066	10	753.407	N	30	VH	0.8	934.225	3716.4	4092.6	-0.101227	5.7	28	0.434667	1.1488	-1.64294		652	652		718	718	0.091922	65	11.375
iso 3 yr	iso 3 yr	L	2	Command and Control	iterative Waterfall Model	1500	625	0.583333	125	564.9	6847.27	5649	1198.27	5720.66	5.72066	171.182	17.5	1198.27	4	1.5	0.0598	1	71.6567	9	514.859	10	572.066	N	30	VH	0.8	709.361	3231.9	3380.1	-0.0458554	5.7	28	0.378	0.9488	-1.51005		567	567		593	593	0.0438449	58.4	10.22
cmmi2 2 yr	cmmi2 2 yr	N	3	Command and Control	iterative Waterfall Model	1500	625	0.583333	125	2.5	30.303	25	5.30302	24.5976	0.0245976	1.02722	20	6.0606	4	1.5	0.0586	1	0.355151	10	2.45976	10	2.45976	N	30	H	0.6	2.90251	580	50.75	0.9125	10	28	0.0386667	0.00812	0.79			58	5.075		5.075	-10.4286	59	11.8
cmmi2 1 yr	cmmi2 1 yr	N	3	Command and Control	iterative Waterfall Model	1500	625	0.583333	125	332.63	4031.88	3326.3	705.578	3272.76	3.27276	136.674	20	806.376	4	1.5	0.0586	1	47.2536	10	327.276	10	327.276	N	30	H	0.6	386.185	3570	3470	0.0280112	10	28	0.238	0.5552	-1.33277		357	357		347	347	-0.0288184	58.4	11.68
cmmi2 2 yr	cmmi2 2 yr	N	3	Command and Control	iterative Waterfall Model	1500	625	0.583333	125	2707.57	32819	27075.7	5743.32	26639.9	26.6399	1112.51	20	6563.8	4	1.5	0.0586	1	384.639	10	2663.99	10	2663.99	N	30	H	0.6	3143.5	19510	29110	-0.492055	10	28	1.30067	4.6576	-2.58093		1951	1951		2911	2911	0.329784	59.3	11.86
CMMI2	CMMI2	N	3	Command and Control	iterative Waterfall Model	1500	625	0.583333	125	8170.48	99036.1	81704.8	17331.3	80389.6	80.3896	3357.16	20	19807.2	4	1.5	0.0586	1	1160.7	10	8038.96	10	8038.96	N	30	H	0.6	9485.97	63400	70175.4	-0.106868	10	28	4.22667	11.2281	-1.65648	0	6340	6340	0.541667	7017	7017.54	0.0965497	61	12.2
CMMI2 1 yrs 2008	CMMI2 1 yrs 2008	N	3	Command and Control	iterative Waterfall Model	1500	625	0.583333	125	921.87	11174.2	9218.7	1955.48	9070.31	9.07031	378.786	20	2234.84	4	1.5	0.0586	1	130.961	10	907.031	10	907.031	N	30	H	0.6	1070.3	9005	15081.5	-0.674789	10	28	0.600333	2.41304	-3.01949	284.5	616	900.5	686.147	822	1508.15	0.40291	65	13
CMMI2 yrs	CMMI2 yrs	N	3	Command and Control	iterative Waterfall Model	1500	625	0.583333	125	851.63	10322.8	8516.3	1806.49	8379.21	8.37921	349.925	20	2064.56	4	1.5	0.0586	1	120.983	10	837.921	10	837.921	N	30	H	0.6	988.747	8091	8936.7	-0.104524	10	28	0.5394	1.42987	-1.65086	0.1	809	809.1	7.67	886	893.67	0.0946322	65	13
ML 3	ML 3	H	5.06	Supply/ Demand	Incremental	1280	1240	0.03125	176	378	18462	12923.4	5538.6	13437.4	13.4374	307.314	30	5538.6	6	3.2	0.0928	1	513.982	50	6718.69	7	940.617	VH	10	N	0.4	978.241	87000	85500	0.0172414	15	8	4.53125	4.59677	-0.0144605	5800		5800	5700		5700	-0.0175439	58	17.4
ML 3	ML 3	H	5.06	Financial	Incremental	360	344	0.0444444	176	230	12918	9042.6	3875.4	9382.09	9.38209	186.99	30	3875.4	6	2.6	0.0876	1	339.485	50	4691.04	5	469.104	H	20	N	0.4	506.633	42990	41385	0.0373343	15	6	7.96111	8.02035	-0.00744089	2866		2866	2759		2759	-0.0387822	65	19.5
CMM3, CMMI3	CMM3, CMMI3	H	5.06	Business Application	Waterfall with Feedback Loop	1861.54	1155	0.379544	176	183.8	5693.2	2846.6	2846.6	3095.96	3.09596	192.99	50	2846.6	8	0.6	0.0876	1	249.362	50	1547.98	5	154.798	H	20	N	0.4	167.182	18180	17235	0.0519802	15	12	0.651076	0.994805	-0.527941	1212		1212	1149		1149	-0.0548303	60.8	30.4
ML 3	ML 3	H	5.06	Business Application	Incremental	460	444	0.0444444	176	240	13018	9112.6	3905.4	9462.09	9.46209	252	30	3905.4	6	2.6	0.0776	1	349.485	50	4731.04	6	459.104	H	20	N	0.4	495.833	42990	41385	0.0373343	15	7	6.23043	6.21396	0.00264361	2866		2866	2759		2759	-0.0387822	60.8	18.24
ML 3	ML 3	H	5.06	Financial	Incremental	1260	1260	0	176	370	18462	12923.4	5538.6	13437.4	13.4374	388.5	30	5538.6	6	3.2	0.0928	1	513.982	50	6718.69	7	940.617	VH	10	N	0.4	978.241	87000	85500	0.0172414	15	8	4.60317	4.52381	0.0172414	5800		5800	5700		5700	-0.0175439	60.8	18.24
ML 3	ML 3	H	5.06	Financial	Incremental	501	474	0.0538922	176	241	13100	9170	3930	9514.27	9.51427	253.05	30	3930	6	2.6	0.0876	1	344.268	50	4757.13	5	475.713	H	20	N	0.4	513.77	42990	41385	0.0373343	15	6	5.72056	5.82068	-0.0175011	2866		2866	2759		2759	-0.0387822	65	19.5
CMM4, CMMI4	CMM4, CMMI4	VH	5.79	Business Application	Waterfall with Feedback Loop	1872	1528	0.183761	176	78.25	2423.79	969.518	1454.28	1095.75	1.09575	82.1625	60	1454.28	8	0.6	0.0868	1	126.231	30	328.725	3	32.8725	H	20	L	0.2	34.1874	87648	98846	-0.127761	22	4	2.12821	2.94045	-0.381655	3984		3984	4493		4493	0.113287	58	34.8
CMM4, CMMI 4	CMM4, CMMI 4	VH	5.79	Business Application	Prototype	1640	1560	0.0487805	176	82	2539.95	1015.98	1523.97	1148.26	1.14826	86.1	60	1523.97	8	0.6	0.0868	1	132.281	30	344.478	3	34.4478	H	20	L	0.2	35.8257	109692	66748	0.391496	22	5	3.04024	1.94487	0.360291	4986		4986	3034		3034	-0.643375	59	35.4
CMM4, CMMI 4	CMM4, CMMI 4	VH	5.79	Business Application	Waterfall with Feedback Loop	1360	1256	0.0764706	176	146.4	4534.74	1813.9	2720.84	2050.07	2.05007	153.72	60	2720.84	8	0.6	0.0868	1	236.169	30	615.02	3	61.502	H	20	L	0.2	63.962	201300	179344	0.109071	22	8	6.72794	6.49045	0.0352999	9150		9150	8152		8152	-0.122424	60	36
CMM4, CMMi 4	CMM4, CMMi 4	VH	5.79	Business Application	Waterfall with Feedback Loop	1144	1144	0	176	26.6	823.935	329.574	494.361	372.485	0.372485	27.93	60	494.361	8	0.6	0.0868	1	42.9105	30	111.745	3	11.1745	H	20	L	0.2	11.6215	57508	60962	-0.0600612	22	4	2.28497	2.4222	-0.0600612	2614		2614	2771		2771	0.0566582	59	35.4
CMM4, CMMI4	CMM4, CMMI4	VH	5.79	Business Application	Waterfall with Feedback Loop	1864	1520	0.184549	176	76	2354.1	941.64	1412.46	1064.24	1.06424	79.8	60	1412.46	8	0.6	0.0868	1	122.602	30	319.272	3	31.9272	H	20	L	0.2	33.2043	89848	92246	-0.0266895	22	4	2.19099	2.75855	-0.259046	3890		4084	4390		4193	0.0259957	51	30.6
CMM4, CMMI 4	CMM4, CMMI 4	VH	5.79	Business Application	Waterfall with Feedback Loop	1600	1550	0.03125	176	71	2199.22	879.69	1319.53	994.226	0.994226	74.55	60	1319.53	8	0.6	0.0868	1	114.536	30	298.268	3	29.8268	H	20	L	0.2	31.0198	87692	69432	0.208229	22	5	2.49125	2.03613	0.182688	4945		3986	3024		3156	-0.262991	57	34.2
CMM4, CMMI 4	CMM4, CMMI 4	VH	5.79	Business Application	Waterfall with Feedback Loop	1376	1156	0.159884	176	140	4336.5	1734.6	2601.9	1960.44	1.96044	147	60	2601.9	8	0.6	0.0868	1	225.845	30	588.133	3	58.8133	H	20	L	0.2	61.1659	134882	159544	-0.182841	22	8	4.45567	6.27336	-0.40795	9100		6131	899		7252	0.154578	59	35.4
CMM4, CMMi 4	CMM4, CMMi 4	VH	5.79	Business Application	Waterfall with Feedback Loop	1040	944	0.0923077	176	25	774.375	309.75	464.625	350.079	0.350079	26.25	60	464.625	8	0.6	0.0868	1	40.3295	30	105.024	3	10.5024	H	20	L	0.2	10.9225	26642	31878	-0.196532	22	4	1.16442	1.53496	-0.318213	1911		1211	2001		1449	0.164251	58	34.8
ML 5.	ML 5.	EH	6.79	Business Application	Waterfall with Feedback Loop	2576	2552	0.00931677	176	81.75	2532.21	633.052	1899.15	796.379	0.796379	85.8375	75	1899.15	8	0.6	0.086	1	163.327	15	119.457	1	7.96379	H	20	VL	0	7.96379	138000	123750	0.103261	30	3	1.78571	1.61638	0.0948276	4600		4600	4125		4125	-0.115152	59	44.25
ML 5.	ML 5.	EH	6.79	Business Application	Waterfall with Feedback Loop	3816	3096	0.188679	176	460.75	14271.7	3567.93	10703.8	4488.46	4.48846	483.788	75	10703.8	8	0.6	0.086	1	920.527	15	673.269	1	44.8846	H	20	VL	0	44.8846	204000	261360	-0.281176	30	3	1.78197	2.81395	-0.579124	6800		6800	8712		8712	0.219467	58.4	43.8
ML 5.	ML 5.	EH	6.79	Business Application	Waterfall with Feedback Loop	1864	1656	0.111588	176	117.75	3647.31	911.827	2735.48	1147.08	1.14708	123.638	75	2735.48	8	0.6	0.086	1	235.251	15	172.062	1	11.4708	H	20	VL	0	11.4708	182580	162540	0.10976	30	5	3.26502	3.27174	-0.00205747	6086		6086	5418		5418	-0.123293	58	43.5
ML 5.	ML 5.	EH	6.79	Business Application	Waterfall with Feedback Loop	1864	1656	0.111588	176	27.15	840.971	210.243	630.728	264.485	0.264485	28.5075	75	630.728	8	0.6	0.086	1	54.2426	15	39.6728	1	2.64485	H	20	VL	0	2.64485	100080	137010	-0.369005	30	3	1.7897	2.75785	-0.540957	3336		3336	4567		4567	0.269542	59	44.25
ML 5.	ML 5.	EH	6.79	Business Application	Waterfall with Feedback Loop	1144	1144	0	176	33	1022.17	255.544	766.631	321.474	0.321474	34.65	75	766.631	8	0.6	0.086	1	65.9303	15	48.2211	1	3.21474	H	20	VL	0	3.21474	70740	72750	-0.0284139	30	4	2.06119	2.11976	-0.0284139	2358		2358	2425		2425	0.0276289	60	45
ML 5.	ML 5.	EH	6.79	Business Application	Waterfall with Feedback Loop	2672	2048	0.233533	176	110.7	3428.93	857.233	2571.7	1078.4	1.0784	116.235	75	2571.7	8	0.6	0.086	1	221.166	15	161.76	1	10.784	H	20	VL	0	10.784	261690	215190	0.177691	30	5	3.2646	3.50244	-0.0728561	8723		8723	7173		7173	-0.216088	58	43.5
ML 5.	ML 5.	EH	6.79	Business Application	Waterfall with Feedback Loop	2536	1816	0.283912	176	240	7434	1858.5	5575.5	2337.99	2.33799	252	75	5575.5	8	0.6	0.086	1	479.493	15	350.699	1	23.3799	H	20	VL	0	23.3799	190530	170040	0.107542	30	4	2.50434	3.12115	-0.246296	6351		6351	5668		5668	-0.120501	60.8	45.6
ML 5.	ML 5.	EH	6.79	Business Application	Waterfall with Feedback Loop	2536	1816	0.283912	176	1255.1	38876.7	9719.18	29157.5	12226.7	12.2267	1317.86	75	29157.5	8	0.6	0.086	1	2507.55	15	1834.01	1	122.267	H	20	VL	0	122.267	344310	281040	0.183759	30	6	4.52563	5.15859	-0.139861	11477		11477	9368		9368	-0.225128	59	44.25
ML 5, ISO	ML 5, ISO	EH	6.79	Business Application	Waterfall with Feedback Loop	1144	1144	0	176	12.6	390.285	97.5713	292.714	122.745	0.122745	13.23	75	292.714	8	0.6	0.086	1	25.1734	15	18.4117	1	1.22745	H	20	VL	0	1.22745	65910	99480	-0.509331	30	3	1.92045	2.8986	-0.509331	2197		2197	3316		3316	0.337455	59	44.25
ML 5, ISO	ML 5, ISO	EH	6.79	Business Application	Waterfall with Feedback Loop	3784	4568	-0.207188	176	235.1	7282.22	1820.56	5461.67	2290.26	2.29026	246.855	75	5461.67	8	0.6	0.086	1	469.703	15	343.539	1	22.9026	H	20	VL	0	22.9026	234900	195450	0.167944	30	4	2.06924	1.42623	0.310749	7830		7830	6515		6515	-0.201842	60.8	45.6
ML 5, ISO	ML 5, ISO	EH	6.79	Business Application	Waterfall with Feedback Loop	9552	9552	0	176	635	19669.1	4917.28	14751.8	6185.94	6.18594	666.75	75	14751.8	8	0.6	0.086	1	1268.66	15	927.891	1	61.8594	H	20	VL	0	61.8594	562230	498810	0.112801	30	3	1.962	1.74068	0.112801	18741		18741	16627		16627	-0.127143	58.4	43.8
ML 5. ISO	ML 5. ISO	EH	6.79	Business Application	Waterfall with Feedback Loop	560	560	0	176	8	247.8	61.95	185.85	77.9331	0.0779331	8.4	75	185.85	8	0.6	0.086	1	15.9831	15	11.69	1	0.779331	H	20	VL	0	0.779331	49830	49830	0	30	4	2.96607	2.96607	0	1661		1661	1661		1661	0	59	44.25
ML 5. ISO	ML 5. ISO	EH	6.79	Business Application	Waterfall with Feedback Loop	1488	592	0.602151	176	42	1300.95	325.238	975.713	409.149	0.409149	44.1	75	975.713	8	0.6	0.086	1	83.9113	15	61.3723	1	4.09149	H	20	VL	0	4.09149	66360	54450	0.179476	30	3	1.48656	3.06588	-1.0624	2212		2212	1815		1815	-0.218733	61	45.75
ML 5. ISO	ML 5. ISO	EH	6.79	Business Application	Waterfall with Feedback Loop	2904	2488	0.143251	176	70	2168.25	542.062	1626.19	681.915	0.681915	73.5	75	1626.19	8	0.6	0.086	1	139.852	15	102.287	1	6.81915	H	20	VL	0	6.81915	487200	336930	0.308436	30	7	5.59229	4.51407	0.192805	16240		16240	11231		11231	-0.445998	61	45.75
ML 5. ISO	ML 5. ISO	EH	6.79	Business Application	Waterfall with Feedback Loop	3184	2920	0.0829146	176	101	3128.48	782.119	2346.36	983.905	0.983905	106.05	75	2346.36	8	0.6	0.086	1	201.787	15	147.586	1	9.83905	H	20	VL	0	9.83905	364470	267960	0.264795	30	17	3.81564	3.0589	0.198325	12149		12149	8932		8932	-0.360166	62	46.5
ML 5. ISO	ML 5. ISO	EH	6.79	Business Application	Waterfall with Feedback Loop	2032	2440	-0.200787	176	67.3	2084.62	521.154	1563.46	655.612	0.655612	70.665	75	1563.46	8	0.6	0.086	1	134.458	15	98.3418	1	6.55612	H	20	VL	0	6.55612	128580	125130	0.0268315	30	4	2.10925	1.70943	0.189558	4286		4286	4171		4171	-0.0275713	63	47.25
ML 5. ISO	ML 5. ISO	EH	6.79	Business Application	Prototype	1040	1040	0	176	201	6225.98	1556.49	4669.48	1958.07	1.95807	211.05	75	4669.48	8	0.6	0.086	1	401.575	15	293.71	1	19.5807	H	20	VL	0	19.5807	104400	95160	0.0885057	30	5	3.34615	3.05	0.0885057	3480		3480	3172		3172	-0.0970996	58	43.5
	Data in Red Color Font is either an outlier because of following reasons:
	1. Missing values which are impossible to be replaced using method like replacing it with mean value
	Rows marked Red were not included in Analysis
	Organization	Maturity Level ( Included / Initially Collected)	Domain	Inclusion/Exclusion
	1	0 (15 / 18), 1 (10/14), 2 (6/7)	Health care	√
	2	3 (6/7), 4 (4/4), 5 (17/17)	Finance	√
	3	4 (4/4)	Mortgage	√
[truncated: 103 more columns]

## Sheet: IDVar
Software Understanding Increment SU	Programmer Unfamiliarity (UNFM)	Project's Resembellance to Previously developed projects, Precedentedness (PREC)	Degree of Conformance Enforced to Requirements and Schedule, Development. Flexibility (FLEX)	Architecture / Risk Resolution (RESL)	Stakeholder Sticking Together, Cohesion (TEAM)	Process Maturity Ranking (PMAT)	Required Software Reliability (RELY)	Data Size (DATA)	Analyst Capability (ACAP)	Programmer Capability (PCAP)	Project's Annual Personnel Turnover or Conitnuity (PCON)	Manager Experience (MEXP)	Team Experience with Applications (AEXP)	Team Experience with Platform (PEXP)	Team's Language and Tool Experience (LTEX)	Use of Software Tools (TOOL)	Multi Site Development, SITE Location and Communication (SITE)	Required Development Schedule (SCED)	Budget Pressure (BUDG)
SU is expressed quantitatively as a percentage. If the software is rated very high on structure, applications clarity, and self-descriptiveness, the software understanding and interface-checking penalty is 10%. If the software is rated very low on these factors, the penalty is 50%. SU is determined by taking the subjective average of the three categories. (Structure + Application Clarity + Self D…	The UNFM parameter is applied multiplicatively to the software understanding effort increment. If the programmer works with the software every day, the 0.0 multiplier for UNFM will add no software understanding increment. If the programmer has never seen the software before, the 1.0 multiplier will add the full software understanding effort increment. Note: select if Maintenance Phase Exists.	If the product is similar to several that have been develop.	It captures the amount of constraints/conditions the product has to meet. The more flexible the requirements, schedules, interfaces, etc.	This cost driver is a combination of (Design throughness by Product Design Review (PDR) and Risk Elimination by PDR. It also relates rating with RUP/MBASE Life Cycle Architecture (LCA) as well as waterfall PDR. It captures the thoroughness of definition and freedom from risk of the software architecture used for the product. RESL rating is Subjective Weighted Average of the listed 7 Characterstic…	Accounts for sources of project turbulence (disorder) and extra effort due to difficulties in synchronizing project's stakeholders like (users, customers, developers, main tainers, interfacers and others)	PMAT Rating'!A1	This is the measure of the extent to which the software must perform its intended function over a period of time. If the effect of a software failure is only slight inconvenience then RELY is low. If a failure would risk human life then RELY is very high. If the developed software is installed and the failure of the software leads to ...	This measure attempts to capture the affect large data requirements have on product development. The rating is determined by calculating D/P. Data = Number of bytes of data in DB at the end of testing / SLOC. Example: DATA is rated as low if D/P is less than 10 and it is very high if it is greater than 1000.	The major attributes that should be considered in this rating are Analysis and Design ability, efficiency and thoroughness, and the ability to communicate and cooperate. The rating should not consider the level of experience of the analyst; that is rated with AEXP. Analysts that fall in the 15th percentile are rated very low and those that fall in the 95th percentile are rated as very high.	Evaluation should be based on the capability of the programmers as a team rather than as individuals. Major factors which should be considered in the rating are ability, efficiency and thoroughness, and the ability to communicate and cooperate. The experience of the programmer should not be considered here; it is rated with AEXP. A very low rated programmer team is in the 15th percentile and a ve…	This denotes number of personnel goes out and or comes in to the project. The rating scale is in terms of the project’s annual personnel turnover: from 3%, very high, to 48%, very low.	This rating is dependent on the level of applications (with this type of application) experience of the project manager managing the software system. A very low rating is for Management experience of less than 3 years A very high rating is for experience of 6 years or more.	This rating is dependent on the level of applications experience of the project team with this type of application (i.e. both Analysts and Programmers, etc.) developing the software system. A very low rating is for application experience of less than 2 months. A very high rating is for experience of 6 years or more.	The average platform experience for the development team. Platform Experience includes know how of graphic user interface, database, networking, and distributed middleware capabilities. A very low rating is for Platform experience of less than 2 months. A very high rating is for experience of 6 years or more.	This is a measure of the level of Programming Language and Software Tool experience of the project team. Tools may includes those used for, performing requirements and design representation and analysis, configuration management, document extraction, library management, program style and formatting, consistency checking, etc. A low rating given for experience of less than 2 months. A very high ra…	The tool rating ranges from simple edit and code, very low, to integrated lifecycle management tools, very high.	Given the increasing frequency of multisite developments, and indications that multisite development effects are significant. It determines aassessment and averaging of two factors: 1. Site collocation (from fully collocated to international distribution) and 2. Communication Support (from surface mail and some phone access to full interactive multimedia)	This rating measures the schedule constraint imposed on the project team developing the software. The ratings are defined in terms of the percentage of schedule stretch-out or acceleration with respect to a nominal schedule for a project requiring a given amount of effort.	This rating measures the Budget constraint imposed on the project team developing the software. The ratings are defined in terms of the percentage of Budget increased or reduced with respect to a nominal Budget for a project requiring a given amount of effort. Note: May be High and Very high ratings practically does not exists in reality.
a) VL: 50% penalty on interface checking: Very low cohesion, high coupling, spaghetti code. No match between program and application world views. Obscure code; documentation missing, obscure or obsolete	a) VL: 0.0: Completely Familier	a. VL: Thoroughly/Indepth un-Similar: 1. General Organizational understanding of product objectives. 2. Moderate Experience in working with related software systems, 3. Extensive Concurrent development of associated new hardware and Operational Procedures, 4. Considerable need for innovative dataprocessing architectures, algorithms. Embedded >30,000 dsi. CMMI Level 1-2	a. VL: Rigorous: 1. Need for Full software conformance with pre-established requirements. 2. Need for Full Software Conformance with external interface Specifications. 3. Combination of High inflexibilities above with premium on early completion.	a. VL: Little 20% freedom from risk: 1. Risk Management Plan (RMP) identifies No Critical Risk Items, and establishes No milestones for resolving them by PDR. 2. No Schedule, Budget and internal milestones defined compatible with RMP 3. About 5% schedule is devoting to establishing architecture for general product objective. 4. around 20% of requirement of top Architects available for project. 5.…	a. VL: Very difficult interactions: 1. Little Consistency of stakeholder objectives and cultures, 2. Little ability, willingness of stakeholder's objectives, 3. No experience of stakeholders in Operating as a team, 4. No stateholder's team building to acheive shared vision and commitments	a. VL: CMMI Level 1 (lower level) equivalent. OR CMM Level 1. OR Incase of ISO Certified mark Yes/No	a. VL: Slightly inconvenience to the users: 1. RE and Prod design phase, contains little detail many TBDs, little verification, Minimal QA, CM, draft user manual, test plans, Minimal PDR. 2. Detailed Design: basic design information, Minimal QA, CM, Draft User manual, test plans, Informal design inspections. 3. Code and Unit testing: No test procedures, Minimal path test, standards check, Minimal…	a. L: <1000 bytes	a. VL: <= 15th Percentile	a. VL: <= 15th Percentile	a. VL: >= 48% Continuity per year	a. VL: <= 2 years	a. VL: <= 2 months	a. VL: <= 2 months	a. VL: <= 2 months	a. VL: Edit, code, debug	a. VL: 1. International, 2. Some phone, mail	a. VL: 75% of nominal	a. VL: 75% of nominal
b) L: 40% : Moderately low cohesion, high coupling. Some correlation between program and application. Some code commentary and headers; some useful documentation.	b) L: 0.2: Mostely Familier	b. L: Largely/mostly un-Similar:	b. L: Occasional relaxation:	b. L: Some (40%): 1. Risk Management Plan identifies Little Critical Risk Items, and establishes milestones for resolving them by PDR. 2. Little Schedule, Budget and internal milestones defined compatible with RMP 3. About 10% schedule is devoting to establishing architecture for general product objective. 4. around 40% of requirement of top Architects available for project. 5. Little tool suppor…	b. L: Some difficult interactions: 1. Some Consistency of stakeholder objectives and cultures, 2. Some ability, willingness of stakeholder's objectives, 3. Little experience of stakeholders in operating as a team, 4. Little stateholder's team building to acheive shared vision and commitments	b. L: CMMI level 1 (upper level) equivalent. OR CMM Level 1. OR Incase of ISO Certified mark Yes/No	b. L: Easily recoverable losses to the users: 1. RE and Prod design phase: basic detail Frequent TBDs, verification, Basic QA, CM, draft user manual, test plans, standards. 2. Detailed Design: Moderate information, Basic QA, CM, Draft User manual, test plans 3. Code and Unit testing: Minimal test procedures, Partial path test, standards check, Basic QA, CM, and usermanuals. Partial I/O and off no…	b. N: 1001 to 10,000 bytes	b. L: 35h percentile. CMMI Level 2	b. L: 35h percentile	b. L: 24% Countinuity per year	b. L: 3 years	b. L: 6 months	b. L: 6 months	b. L: 6 months	b. L: Simple, front end back end CASE little integration. CMMI Level 1	b. L: 1. Multi-city and Multi-company, 2. Individual phone, FAX	b. L: 85% of nominal	b. L: 85% of nominal
c) N: 30% : Reasonably well- structured; some weak areas. Moderate correlation between program and application. Moderate level of code commentary, headers, documentations.	c) N: 0.4: Some What Familier	c. N: Somewhat/abit un-Simillar: 1. Considerable Organizational understanding of product objectives. 2. Considerable Experience in working with related software systems, 3. Moderate Concurrent development of associated new hardware and Operational Procedures, 4. Some need for innovative dataprocessing architectures, algorithms. semidetached. CMMI Level 3-4	c. N: some relaxation: 1. Need for Considerable software conformance with pre-established requirements. 2. Need for Considerable Software Conformance with external interface Specifications. 3. Combination of Medium inflexibilities above with premium on early completion.	c. N: Often (60%): 1. Risk Management Plan identifies Some Critical Risk Items, and establishes milestones for resolving them by PDR. 2. Some Schedule, Budget and internal milestones defined compatible with RMP 3. About 17% schedule is devoting to establishing architecture for general product objective. 4. around 60% of requirement of top Architects available for project. 5. Some tool support for…	c. N: Basically co-operative interactions: 1. Basic Consistency of stakeholder objectives and cultures, 2. Basic ability, willingness of stakeholder's objectives, 3. Little experience of stakeholders in operating as a team, 4. Little stateholder's team building to acheive shared vision and commitments	c. N: CMMI Level 2 equivalent. OR CMM Level 2. OR Incase of ISO Certified mark Yes/No	c. N: M oderate easily recoverable losses to users:	c. H: 10,001 to 100,000 bytes	c. N: 55th percentile. CMMI Level --> 3	c. N: 55th percentile	c. N: 12% Countinuity per year	c. N: 4 year	c. N: 1 year	c. N: 1 year	c. N: 1 year	c. N: Basic lifecycle tools moderately integrated. CMMI Level 2	c. N: 1. Multi-city or Multi-company, 2. Narrowband email	c. N: 100%	c. N: 100%
d) H: 20%: High cohesion, low coupling. Good correlation between program and application. Good code commentary and headers; useful documentation; some weak areas.	d) H: 0.6: Considerably Familiar	d. H: Generally/mostly familiar: 1. Considerable Organizational understanding of product objectives. 2. Considerable Experience in working with related software systems, 3. Moderate Concurrent development of associated new hardware and Operational Procedures, 4. Some need for innovative dataprocessing architectures, algorithms. Semidetached <30,000 dsi. CMMI Level 4	d. H: general conformity: 1. Need for Considerable software conformance with pre-established requirements. 2. Need for Considerable Software Conformance with external interface Specifications. 3. Combination of Medium inflexibilities above with premium on early completion.	d. Generally(75%): 1. Risk Management Plan identifies Generally Critical Risk Items, and establishes milestones for resolving them by PDR. 2. Generally Schedule, Budget and internal milestones defined compatible with RMP 3. About 25% schedule is devoting to establishing architecture for general product objective. 4. around 80% of requirement of top Architects available for project. 5. Good tool s…	d. H: Largely cooperative interactions: 1. Considerable Consistency of stakeholder objectives and cultures, 2. Considerable ability, willingness of stakeholder's objectives, 3. Basic experience of stakeholders in operating as a team, 4. Basic stateholder's team building to acheive shared vision and commitments. CMMI Level 3	d. H: CMMI Level 3 equivalent. OR CMM Level 3. OR Incase of ISO Certified mark Yes/No	d. H: High financial loss to the users: 1. RE and Prod design phase: Detailed verification, QA, CM, PDR, documentation, test plans and procedures, standards. 2. Detailed Design: Detailed verification, QA, CM, standards, CDR, documentation, test plans, procedures. 3. Code and Unit testing: Detailed test procedures, QA, CM, documentation. Extensive off nominal tests 4. Integration and Test: Detaile…	d. VH: Greater than 100,000 bytes	d. H: 75th percentile. CMMI Level 3	d. H: 75th percentile	d. H: 6% Countinuity per year	d. H: 5 years	d. H: 3 years	d. H: 3 years	d. H: 3 years	d. H: Strong, mature life cycle tools, moderately integrated. CMMI Level 3	d. H: 1. Same city or metro. Area, 2. Wideband electronic communication.	d. H: 130%	d. H: 130%
e) VH: 10%: Strong modularity, information hiding in data / control structures. Clear match between program and application world-views. Self-descriptive code; documentation up-to-date, well-organized, with design rationale.	e) VH: 0.8: Mostly Unfamilier	e. VH: Largely familiar:	e. VH: some conformity:	e. Mostly(90%): 1. Risk Management Plan identifies Mostely Critical Risk Items, and establishes milestones for resolving them by PDR. 2. Mostely Schedule, Budget and internal milestones defined compatible with RMP 3. About 33% schedule is devoting to establishing architecture for general product objective. 4. around 100% of requirement of top Architects available for project. 5. Strong tool suppo…	e. VH: Highly cooperative: 1. Strong Consistency of stakeholder objectives and cultures, 2. Strong ability, willingness of stakeholder's objectives, 3. Considerable experience of stakeholders in operating as a team, 4. Considerable stateholder's team building to acheive shared vision and commitments. CMMI Level 3 and above	e. VH: CMMI Level 4 equivalent. OR CMM Level 4. OR Incase of ISO Certified mark Yes/No	e. VH: Risk to human life: 1. RE and Prod design phase: Detailed verification, QA, CM, PDR, documentation. IV & V interface. Very Detailed test plans and procedures, standards. 2. Detailed Design: Detailed verification, QA, CM, standards, CDR, documentation. Very thorough Design inspections. Very Detailed test plans, procedures. IV & V interface. 3. Code and Unit testing: Detailed test procedures…	e. I DON'T KNOW	e. VH: >= 90 percentile. CMMI Level 3 and Above	e. VH: >= 90 percentile	e. VH: <= 3% Countinuity per year	e. VH: >= 6 years	e. VH: >= 6 years	e. VH: >= 6 years	e. VH: >= 6 years	e. VH: Strong mature, proactive life cycle tools, well integrated with processes, methods reuse. CMMI Level 4-5	e. VH: 1. Same building or complex, 2. Wideband elect. comm, occasional video conf.	e. VH: 160%	e. VH: 160%
f) Don’t know	f) EH: 1.0: Completely Unfamilier	f. EH: Thoroughly familiar and Thoroughly Clear Requiremnts: 1. Through Organizational understanding of product objectives. 2. Extensive Experience in working with related software systems, 3. Some Concurrent development of associated new hardware and Operational Procedures, 4. Minimal need for innovative dataprocessing architectures, algorithms. Organic <50,000 . CMMI Level 5	f. EH: general goals: 1. Need for Basic software conformance with pre-established requirements. 2. Need for Basic Software Conformance with external interface Specifications. 3. Combination of Low inflexibilities above with premium on early completion.	f. EH: Full(100%): 1. Risk Management Plan identifies Fully Critical Risk Items, and establishes milestones for resolving them by PDR. 2. Fully Schedule, Budget and internal milestones defined compatible with RMP 3. About 40% schedule is devoting to establishing architecture for general product objective. 4. around 120% of requirement of top Architects available for project. 5. Fully tool support…	f. EH: Seamless interaction: 1. Full Consistency of stakeholder objectives and cultures, 2. Full ability, willingness of stakeholder's objectives, 3. Extensive experience of stakeholders in operating as a team, 4. Extensive stateholder's team building to acheive shared vision and commitments. CMMI Level 3	f. EH: CMMI Level 5 equivalent. OR CMM Level 5. OR Incase of ISO Certified mark Yes/No	f. I DON'T KNOW		f. I DON'T KNOW	f. I DON'T KNOW	f. I DON'T KNOW	f. I DON'T KNOW	f. I DON'T KNOW	f. I DON'T KNOW	f. I DON'T KNOW	f. I DON'T KNOW	f. EH: 1. Fully collocated, 2. Interactive multimedia	f. I DON'T KNOW	f. I DON'T KNOW
	g) Don’t know	g. I DON'T KNOW	g. I DON'T KNOW	g. I DON'T KNOW	g. I DON'T KNOW	g. I DON’T KNOW											g. I DON'T KNOW

## Sheet: PMAT Rating
Process Areas CMMI	KPA CMM-SW	Almost Always	Very Often	About Half	Some Times	Rarely If Ever	Does Not Apply	Don’t Know
		(S)	(U/NR)	(NR)	(NR)	(NR)	(NA)	(NR)
version 1.3	version 1.1	> 90%	60 to 90%	40 to 60%	10 to 40%	< 10%
Competent People and Heroics	Level 1: Initial
01: REQM: Requirement Management EngMng	01: REQM: Requirement Management (REQM)
02: PP: Project Planning ProjMng	02: PP: Project Planning (PP)
03: PMC: Project Monitioring and Control ProjMng	03: PMC: Project Tracking (OPP) and Oversignt (PMC)
04: PPQA: Product and Process Quality Assurance Support	04: Software Subcontract Management (SAM)
05: MA: Measurement and Analysis Support	05: Software Quality Assurance (PPQA)
06: CM: Change Management Support	06: SCM: Software Configuration Management (CM) (OPP) (CAR)
07: SAM: Supplier Agrement Management (valid if have supplier support) ProjMng
Level 2	Level 2: Repeatable
Basic Project Management Processes
08: RD: Requirement Development EngMng	Organization Process Focus (OPF) (OPP)
09: TS: Technical Solution EngMng	Organization Process Defination (OPD)
10: PI: Process Integration EngMng	Training Program (OT)
11: VER: verification EngMng	Integrated Software Managemet (IPM)
12: VAL: Validation EngMng	Software Product Engineering, (CAR) (IPM)
13: OPF (v1.1) or (v1.2): Organizational Process Focuss ProMng	Intergroup Coordination (PI), (IT)
14: OPD (v1.1) or (v1.2): Organizational Process Defination ProMng	Peer Reviews (VER)
Process Standardization / Engineering Processes and Organizational Support	Level 3: Defind
15: OT: Organizational Training ProMng
16: IPM+IPPD (v1.1) or (v1.2): Integrated Project Management for Integrated Process and Product Development ProjMng	Quantitative Process Management (OPP), (QPM) (CAR)
17: RSKM: Risk Management ProjMng	Software Quality Management (IPM) (OPP)
18: IT(v1.1): Integrated Team
19: ISM (v1.1): Integrated Service Management
20: DAR: Decision Analysis and Resolution Support
21: OEI (v1.1): Organizational Environment for Integration
Level 3	Level 4: Quantitatively Managed
Product and Process Quality
22: OPP: Organizational Process Performance ProMng	Defect Prevention (OID) (CAR)
23: QPM: Quantitative Project Management ProjMng	Technology Change Mangement (OID)
	Process Change Management (OID)
Level 4	Level 5: Optimizing
Continious PI
24: OID: Organizational Innovation and Deployment ProMng
25: CAR: Casual Analysis and Resolution Support
Level 5
S: Almost Always (over 90% of the time): when the goals are consistently achieved and are well established in standard operating procedures.
U/NR: Frequently (about 60 to 90% of the time): when the goals are achieved relatively often, but sometimes are omitted under difficult circumstances.
NR: About Half (about 40 to 60% of the time): when the goals are achieved about half of the time.
NR: Occasionally (about 10 to 40% of the time): when the goals are sometimes achieved, but less often.
NR: Rarely If Ever (less than 10% of the time): when the goals are rarely if ever achieved.
NA: Does Not Apply: when you have the required knowledge about your project or organization and the KPA, but you feel the KPA does not apply to your circumstances (e.g. Subcontract Management).
NR: Don't Know: when you are uncertain about how to respond for the KPA.
